# Supplementary material for: Spotted cotton oligonucleotide microarrays for gene expression analysis
Source: PubMed Central journal article supplement (PMC3225879; doi:10.1186/1471-2164-8-81), 2007-03-27
Supplement: 1471-2164-8-81-S1.pdf [file 1471-2164-8-81-S1.pdf]

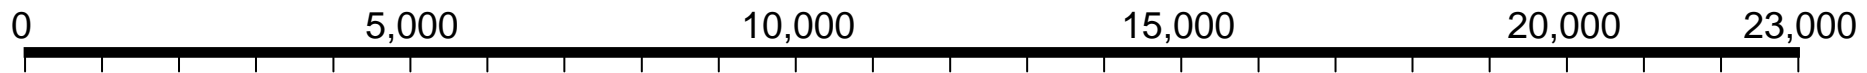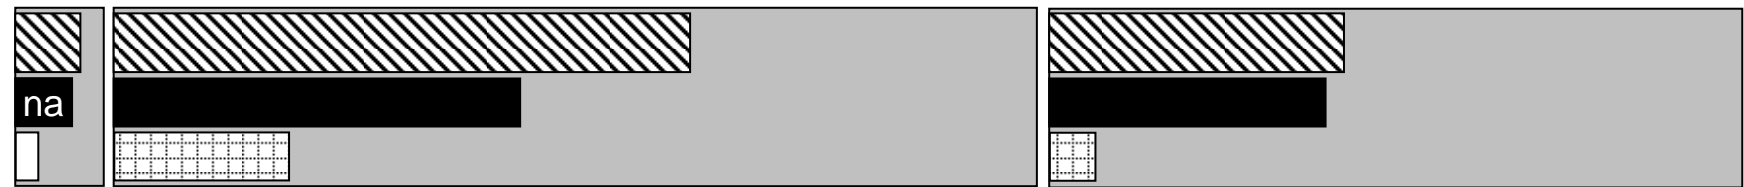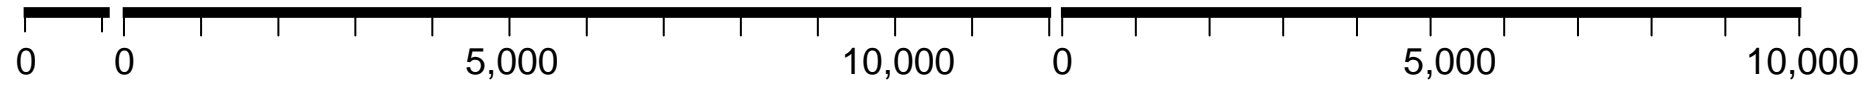

1,154  
1<sup>st</sup> oligo set

12,006 – 2<sup>nd</sup> oligo set

9,329 – 3<sup>rd</sup> oligo set
