# Supplementary material for: Spotted cotton oligonucleotide microarrays for gene expression analysis
Source: PubMed Central journal article supplement (PMC3225879; doi:10.1186/1471-2164-8-81), 2007-03-27
Supplement: 1471-2164-8-81-S2.pdf [file 1471-2164-8-81-S2.pdf]

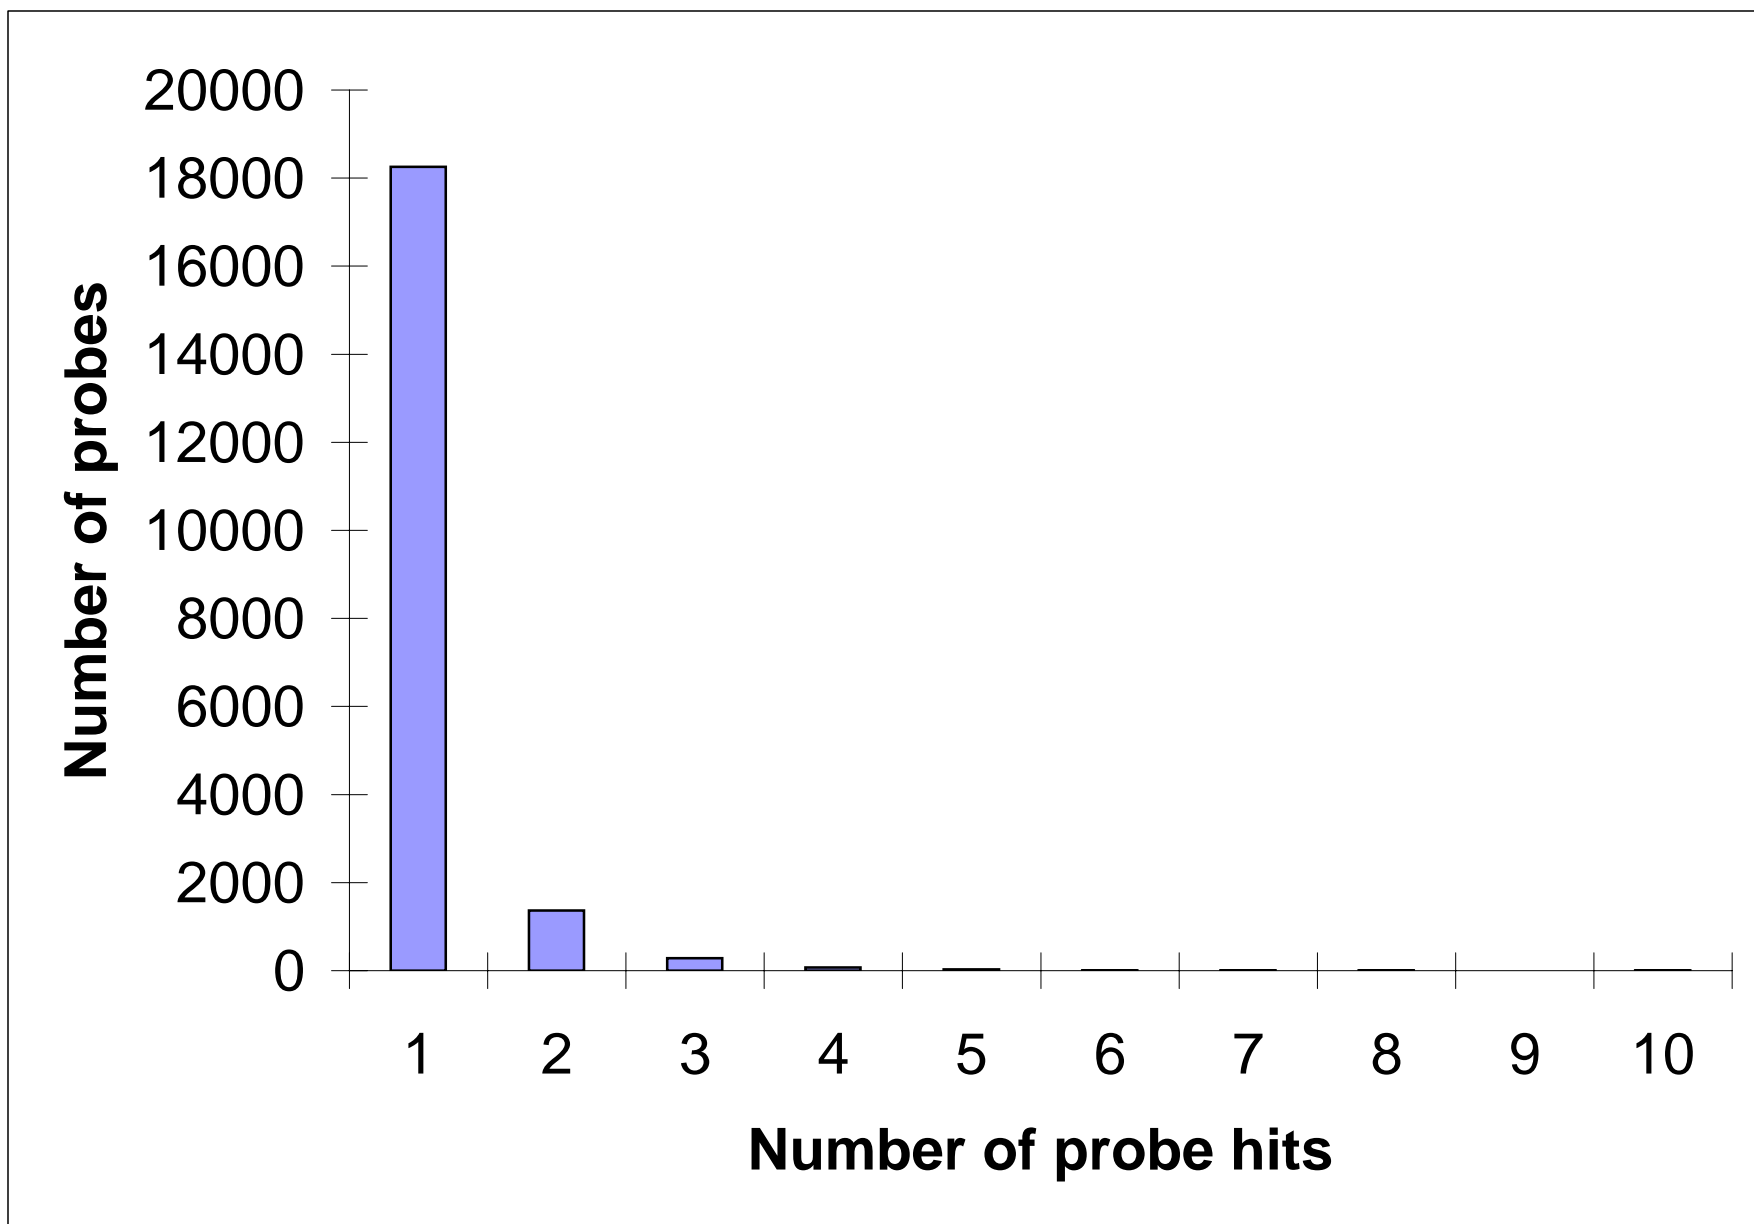

]
