# Supplementary material for: Spotted cotton oligonucleotide microarrays for gene expression analysis
Source: PubMed Central journal article supplement (PMC3225879; doi:10.1186/1471-2164-8-81), 2007-03-27
Supplement: 1471-2164-8-81-S3.pdf [file 1471-2164-8-81-S3.pdf]

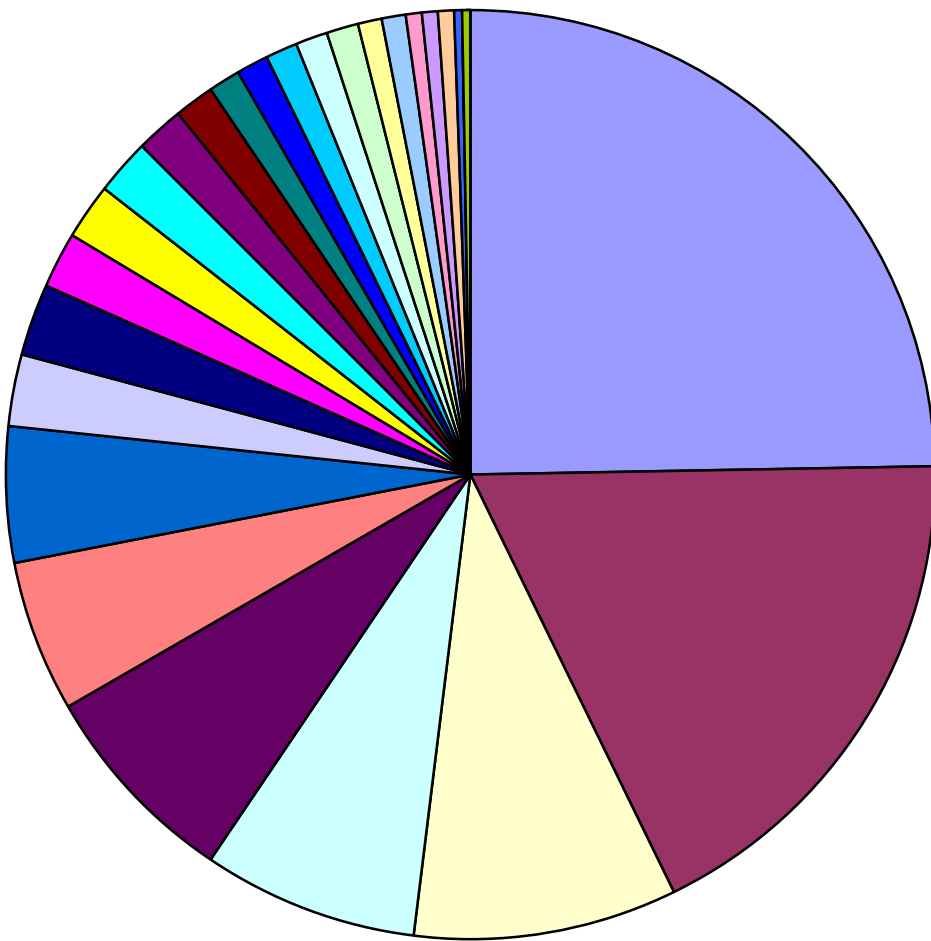

- GA\_Ea
- GH\_CHX
- GH\_BNL
- GH\_CBAZ
- GH\_ON
- GH\_FOX
- GH\_SCW
- GH\_SUO
- GH\_CRH
- GH\_STEM
- GH\_ECOT
- GH\_CFUS
- GH\_LSL
- GH\_LDI
- GH\_MDI
- GH\_SDL
- GH\_IME
- GH\_OCF
- GH\_LDDS
- GH\_ECT
- GH\_MDDS
- GH\_pAR
- GH\_ACXM
- GH\_SDLD
- GH\_ACXL
- GH\_ACXE
- GH\_SDCH
- GH\_IMX
